# Supplementary material for: The Synovium Attenuates Cartilage Degeneration in KOA through Activation of the Smad2/3-Runx1 Cascade and Chondrogenesis-related miRNAs
Source: PubMed Central journal article supplement — Mol Ther Nucleic Acids. 2020 Oct 10;22:832–45. doi: 10.1016/j.omtn.2020.10.004 (PMC7658376; doi:10.1016/j.omtn.2020.10.004), 2020-10-10
Supplement: mmc1.pdf [file mmc1.pdf]

**OMTN, Volume 22**

**Supplemental Information**

**The Synovium Attenuates Cartilage Degeneration  
in KOA through Activation of the Smad2/3-Runx1  
Cascade and Chondrogenesis-related miRNAs**

**Xiaoyi Zhao, Fangang Meng, Shu Hu, Zibo Yang, Hao Huang, Rui Pang, Xingzhao Wen, Yan Kang, and Zhiqi Zhang**

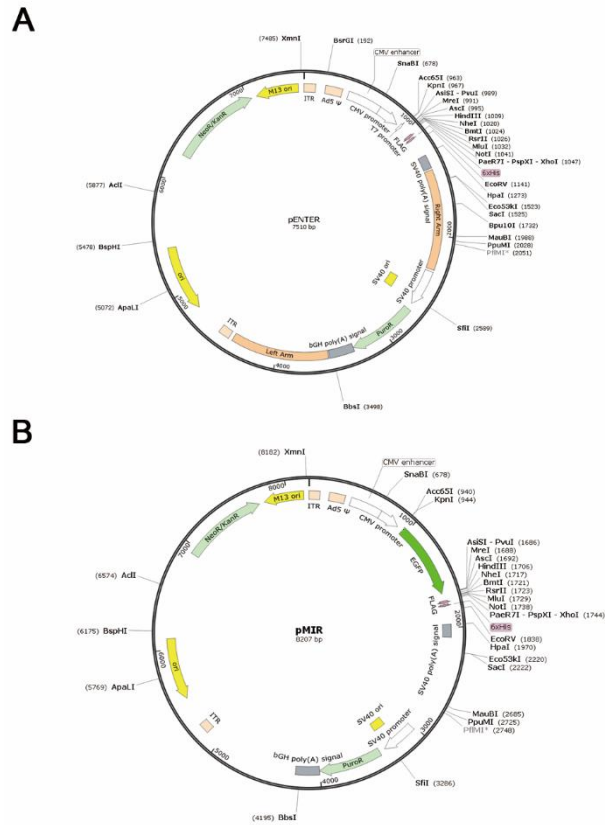

**Figure S1. Illustration of the plasmid vectors.** Properties of the hsa-RUNX1 overexpression plasmid (A). Properties of the hsa-miR-455 and hsa-miR-210 overexpression plasmid (B)

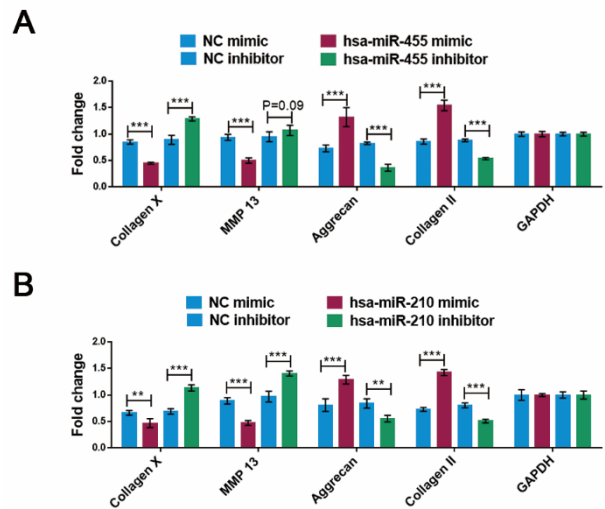

**Figure S2. The grayscale values of the blots were quantitated and statistically analyzed.** The expression patterns of chondrogenic genes and hypertrophic genes in chondrocytes after transfection with the mimic NC, miRNA mimic, inhibitor NC or miRNA inhibitor for miR-455 (A) and miR-210 (B).

**Table S1.** The specific siRNA sequences used in the present study.

| Gene name        |            | siRNA sequence 5'-3'  |
|------------------|------------|-----------------------|
| <b>hsa-RUNX1</b> | Sense      | CCTCGAAGACATCGGCAGAAA |
|                  | Anti-sense | TTTCTGCCGATGTCTTCGAGG |
| <b>hsa-SMAD2</b> | Sense      | CGATTAGATGAGCTTGAGAAA |
|                  | Anti-sense | TTTCTCAAGCTCATCTAATCG |
| <b>hsa-SMAD3</b> | Sense      | GAGCCTGGTCAAGAAACTCAA |
|                  | Anti-sense | TTGAGTTTCTTGACCAGGCTC |

**Table S2.** The primer sequences of putative Runx1 binding sites in the promoter regions of miR-455 and miR-210.

| Gene name                                |            | primer sequence 5'-3'     |
|------------------------------------------|------------|---------------------------|
| <b>Promoter region of hsa-miR-210</b>    | Sense      | CCCCATGGAGGCTCAAGTTCA     |
|                                          | Anti-sense | CATGTGTGTGCCACTTCCCCTA    |
| <b>Promoter region of hsa-miR-455-01</b> | Sense      | TGCAAGCTCCAGGTGGAAAAAT    |
|                                          | Anti-sense | GGAAGGCCTGTATGACTGGA      |
| <b>Promoter region of hsa-miR-455-02</b> | Sense      | CTCCCCAATGCCGTGTTCT       |
|                                          | Anti-sense | TGTGAATGTACCTAACGCTATCGAA |
| <b>Promoter region of hsa-miR-455-03</b> | Sense      | AGTGTGGGTGGTGACAATCTG     |
|                                          | Anti-sense | CATTAACCTAACAGCGGCTGCG    |
| <b>Promoter region of hsa-miR-455-04</b> | Sense      | TCCAGAGGAAAGCTTGGTCC      |
|                                          | Anti-sense | TAGCCTGCTCGTAGAGACCC      |
| <b>Promoter region of hsa-miR-455-05</b> | Sense      | ACAGAGATCCCCTCAGCCAT      |
|                                          | Anti-sense | GAGGTAAGCGTGGAAGCTGT      |
| <b>Promoter region of hsa-miR-455-06</b> | Sense      | CAGCCCCCTGTAGAGGTAA       |
|                                          | Anti-sense | TGCTTGTTTGAGGAGAGGCAG     |

**Table S3.** The specific primer sequences of mRNA used in the present study.

| Gene name          |            | mRNA primer sequence 5'-3' |
|--------------------|------------|----------------------------|
| <b>hsa-ADAMTS4</b> | Sense      | GGTCAAGGTCCCATGTGCAAC      |
|                    | Anti-sense | GAATGCGGCCATCTTGTCATC      |
| <b>hsa-ANCA</b>    | Sense      | GTGCCTATCAGGACAAGGTCT      |
|                    | Anti-sense | GATGCCTTTCCACCACGACTTC     |
| <b>hsa-AR</b>      | Sense      | ATGGTGAGCAGAGTGCCCTATC     |
|                    | Anti-sense | ATGGTCCCTGGCAGTCTCCAAA     |
| <b>hsa-COL1A1</b>  | Sense      | GTGGAAACCCGAGCCCTGCC       |
|                    | Anti-sense | TCCCTTGGGTCCCTCGACGC       |
| <b>hsa-COL2A1</b>  | Sense      | GCACCTGCAGAGACCTGAAAC      |
|                    | Anti-sense | GCAAGTCTCGCCAGTCTCCA       |
| <b>hsa-COL5A1</b>  | Sense      | GCCCGGATGTCGCTTACAG        |
|                    | Anti-sense | AAATGCAGACGCAGGGTACAG      |
| <b>hsa-COL10A1</b> | Sense      | CATAAAAGGCCCACTACCCAAC     |
|                    | Anti-sense | ACCTTGCTCTCCTCTTACTGC      |

|                   |            |                                |
|-------------------|------------|--------------------------------|
| <b>hsa-IRF7</b>   | Sense      | CCACGCTATACCATCTACCTGG         |
|                   | Anti-sense | GCTGCTATCCAGGGAAGACACA         |
| <b>hsa-JUN</b>    | Sense      | CCTGAAAGCTCAGAACTCGGAG         |
|                   | Anti-sense | TGCTGCGTTAGCATGAGTTGGC         |
| <b>hsa-LOX</b>    | Sense      | GTGGCCGACCCCTACTACATCC         |
|                   | Anti-sense | AGCAGCACCCCTGTGATCATAATCTC     |
| <b>hsa-MEF2C</b>  | Sense      | TCCACCAGGCAGCAAGAATACG         |
|                   | Anti-sense | GGAGTTGCTACGGAAACCACTG         |
| <b>hsa-MMP13</b>  | Sense      | TCCTGATGTGGGTGAATACAATG        |
|                   | Anti-sense | GCCATCGTGAAGTCTGGTAAAAT        |
| <b>hsa-MYC</b>    | Sense      | CCTGGTGCTCCATGAGGAGAC          |
|                   | Anti-sense | CAGACTCTGACCTTTTGCCAGG         |
| <b>hsa-PLOD2b</b> | Sense      | TTAAAGGAAAGACACTCCGATCAGAGATGA |
|                   | Anti-sense | AATGTTTCCGGAGTAGGGGAGTCTTTTT   |
| <b>hsa-RUNX1</b>  | Sense      | CCACCTACCACAGAGCCATCAA         |
|                   | Anti-sense | TTCACTGAGCCGCTCGGAAAAG         |
| <b>hsa- RUNX2</b> | Sense      | CCCAGTATGAGAGTAGGTGTCC         |
|                   | Anti-sense | GGGTAAGACTGGTCATAGGACC         |
| <b>hsa- RUNX3</b> | Sense      | GGCAATGACGAGAACTACTCCG         |
|                   | Anti-sense | GATGGTCAGGGTGAAACTCTTCC        |
| <b>hsa-SMAD2</b>  | Sense      | GGGTTTTGAAGCCGTCTATCAGC        |
|                   | Anti-sense | CCAACCACTGTAGAGGTCCATTC        |
| <b>hsa-SMAD3</b>  | Sense      | TGAGGCTGTCTACCAGTTGACC         |
|                   | Anti-sense | GTGAGGACCTTGTC AAGCCACT        |
| <b>hsa-SOX9</b>   | Sense      | AGCGAACGCACATCAAGAC            |
|                   | Anti-sense | CTGTAGGCGATCTGTTGGGG           |
| <b>hsa-VDR</b>    | Sense      | CGCATCATTGCCATACTGCTGG         |
|                   | Anti-sense | CCACCATCATTCACACGAACTGG        |
| <b>hsa-GAPDH</b>  | Sense      | GCACCGTCAAGGCTGAGAAC           |
|                   | Anti-sense | ATGGTGGTGAAGACGCCAGT           |

**Table S4.** The specific primer sequences of miRNA used in the present study.

| Gene name           |            | miRNA primer sequence 5'-3' |
|---------------------|------------|-----------------------------|
| <b>hsa-miR-193b</b> | Sense      | AACUGGCCCUCAAAGUCCCGCU      |
| <b>hsa-miR-199a</b> | Sense      | ACAGUAGUCUGCACAUUGGUUA      |
| <b>hsa-miR-455</b>  | Sense      | GCAGUCCAUGGGCAUUAACAC       |
| <b>hsa-miR-210</b>  | Sense      | AGCCCCUGCCCACCGCACACUG      |
| <b>hsa-miR-381</b>  | Sense      | AGCGAGGUUGCCCUUUGUAUUAU     |
| <b>hsa-miR-92a</b>  | Sense      | UAUUGCACUUGUCCCGGCCUGU      |
| <b>hsa-miR-320c</b> | Sense      | AAAAGCUGGGUUGAGAGGGU        |
| <b>hsa-miR-136</b>  | Sense      | ACUCCAUUUGUUUUGAUGAUGGA     |
| <b>cel-miR-39</b>   | Sense      | UCACCGGGUGUAAAUCAGCUUG      |
| <b>hsa-U6</b>       | Sense      | CTCGCTTCGGCAGCACA           |
|                     | Anti-sense | AACGCTTCACGAATTGCGT         |

**Table S5.** miRNA-specific probes for in situ hybridization analysis

| <b>Gene name</b>       |       | <b>miRNA probe sequence 5`-3`</b> |
|------------------------|-------|-----------------------------------|
| <b>hsa/mmu-miR-455</b> | Probe | DIG-GTGTATATGCCCATGGACTGC-DIG     |
| <b>hsa/mmu-miR-210</b> | Probe | DIG-TCAGCCGCTGTCACACGCACA-DIG     |
| <b>hsa-miR-320c</b>    | Probe | DIG-ACCCTCTCAACCCAGCTTTT-DIG      |
